# Supplementary material for: Hierarchically porous magnetic Fe3O4/Fe-MOF used as an effective platform for enzyme immobilization: a kinetic and thermodynamic study of structure–activity
Source: Royal Society of Chemistry journal article supplement (doi:10.1039/d0cy02146f), 2021-01-01
Supplement: d0cy02146f1.pdf [file d0cy02146f1.pdf]

## Supporting Information

**Hierarchically porous magnetic Fe<sub>3</sub>O<sub>4</sub>/Fe-MOF used as effective platform for enzyme immobilization: kinetic and thermodynamic study on the structure-activity**

Xia Gao,<sup>a,b</sup> Quanguo Zhai,<sup>a</sup> Mancheng Hu,<sup>a</sup> Shuni Li<sup>a</sup> and Yucheng Jiang<sup>\*a</sup>

<sup>a</sup> Key Laboratory of Macromolecular Science of Shaanxi Province, School of Chemistry & Chemical Engineering, Shaanxi Normal University, Xi'an, 710062, P.R. China

<sup>b</sup> Shaanxi Key Laboratory of Comprehensive Utilization of Tailings Resources, Department of Chemical Engineering & Modern Materials, Shangluo University, Shangluo, 726000, P. R. China

\* Corresponding author, Email: [jyc@snnu.edu.cn](mailto:jyc@snnu.edu.cn)

## Experimental

### Materials

Chloroperoxidase (CPO) was isolated from the growth medium of *C. fumago* according to the method established by Morris and Hager with minor modifications using acetone rather than ethanol in the solvent fractionation step. Then, CPO was further purified by DEAE-Sephadex A-50 ion exchange column chromatography. Horseradish peroxidase (HRP, EC 1.11.1.7) was purchased from Shanghai Xueman Biotechnology Co., Ltd and stored at minus 20 °C before use. 2,2-azino-bis(3-ethylbenzothiazoline-6-sulfonic acid) (ABTS) were purchased from Sigma–Aldrich (St. Louis, MO, USA) and stored at 0–4 °C before use. Trimesic acid ( $H_3BTC$ , 99%) was purchased from Alfa Aesar. Dimethyl formamide (DMF) was purchased from Tokyo Chemical Industry Co., Ltd. (Japan). Iron(III) chloride hexahydrate ( $FeCl_3 \cdot 6H_2O$ ), ammonium acetate ( $NH_4Ac$ ), sodium citrate, citric acid, ethylene glycol and zinc nitrate hexahydrate ( $Zn(NO_3)_2 \cdot 6H_2O$ , 99%) were purchased from Beijing Chemical Works (China). Hydrogen peroxide (30% in aqueous solution) was obtained from Xi'an Chemical Co. Ltd. All chemicals are of analytical grade unless otherwise indicated.

### Measurements

$N_2$  adsorption-desorption measurements at 77 K were carried out using an automatic physical adsorption instrument (Micromeritics Instrument Corp, Atlanta, USA). The samples were firstly degassed at 150 °C for 12 h under vacuum. The pore size distribution and the total pore volume were derived according to the desorption branches of the isotherms using the BJH model analyses. The powder X-ray diffraction patterns (PXRD) were recorded on a Rigaku (Woodlands, USA) X-ray Powder Diffractometer equipped with a Cu sealed tube ( $\lambda = 1.5404$

Å) with voltage at 40 kV, the current at 30 mA, the scanning speed at  $1^\circ \cdot \text{min}^{-1}$ , and the scanning range setting at  $5^\circ$  to  $80^\circ$ . The morphologies of the samples were characterized by a field-emission scanning electron microscope (FESEM, Hitachi SU8220, Tokyo, Japan) and a field-emission transmission electron microscope (FETEM, Tecnai G2 F20, Hillsborough County, Florida, USA). Fluorescent tags of enzyme on  $\text{Fe}_3\text{O}_4/\text{Fe-MOF}$  composites were performed on a FV1200 laser scanning confocal microscope (Olympus, Beijing, China), by using fluorescein isothiocyanate (FITC) as fluorescent markers. Thermal analysis was performed on TA Q1000DSC thermoanalyzer systems under  $\text{N}_2$  atmosphere.

Ultraviolet-visible (UV-vis) absorption spectra of proteins were recorded using Perkin-Elmer Lambda 950 UV-vis spectrophotometer. The enthalpic and entropic changes of the enzyme catalytic reaction was measured by isothermal titration calorimetry (Nano ITC-Standard Volume, TA Instruments, New Castle, DE, USA). The interaction of enzyme with the support was investigated by using a thermal conductivity microcalorimeter (RD496-2000, Mianyang CP Thermal Analysis Instrument Co.Ltd).

### **The application of CPO/HRP- $\text{Fe}_3\text{O}_4/\text{Fe-MOF}$**

The simulated wastewater was prepared by mixing the following components:  $12000 \text{ mg} \cdot \text{L}^{-1}$  of glucose,  $12000 \text{ mg} \cdot \text{L}^{-1}$  of starch,  $3420 \text{ mg} \cdot \text{L}^{-1}$  of ammonium sulfate,  $1680 \text{ mg} \cdot \text{L}^{-1}$  of  $\text{K}_2\text{HPO}_4$ ,  $33 \text{ mg} \cdot \text{L}^{-1}$  of  $\text{MgSO}_4 \cdot 7\text{H}_2\text{O}$ ,  $15 \text{ mg} \cdot \text{L}^{-1}$  of sodium acetate,  $240 \text{ mg} \cdot \text{L}^{-1}$  of  $\text{CaCl}_2$ ,  $120 \text{ mg} \cdot \text{L}^{-1}$  of  $\text{MnSO}_4$ ,  $70 \text{ mg} \cdot \text{L}^{-1}$  of peptone, and  $1 \text{ mg} \cdot \text{L}^{-1}$  of  $\text{FeSO}_4 \cdot 7\text{H}_2\text{O}$ .

The degradation of soluble antibiotics isoproturon or 2,4-dichlorophenol was carried out in simulated wastewater with total volume of 3 mL containing 2 mg CPO/HRP- $\text{Fe}_3\text{O}_4/\text{Fe-MOF}$  and isoproturon or 2,4-dichlorophenol in the concentration range of  $0\text{-}10 \text{ mmol} \cdot \text{L}^{-1}$ . The

reaction was started by adding  $\text{H}_2\text{O}_2$  ( $0.1 \text{ mol}\cdot\text{L}^{-1}$ ). After 15 min, the supernatant of the reaction mixture was extracted three times using ethyl acetate in interval 10 min. The combined organic extract was concentrated by rotary evaporation ( $0.09 \text{ Mpa}$ ,  $35 \text{ }^\circ\text{C}$ ) to remove the extractant, and then dissolved in acetonitrile/methanol respectively and treated by  $0.22 \text{ }\mu\text{m}$  organic phase filtration membrane, then measured concentration of isoproturon and 2,4-dichlorophenol by HPLC (LC-20AT, Shimadzu). The mobile phase consisted of a mixture of acetonitrile and water (80:20, v/v, flow-rate gradient elution) for isoproturon and a mixture of methanol and water (60:40, v/v, flow-rate gradient elution) for 2,4-dichlorophenol. The flow rate was  $0.5 \text{ mL}\cdot\text{min}^{-1}$  and the detector was set at  $240 \text{ nm}$  for isoproturon, while the flow rate was  $1.0 \text{ mL}\cdot\text{min}^{-1}$  and the detector was set at  $284 \text{ nm}$  for 2,4-dichlorophenol, with the injection volume of  $20 \text{ }\mu\text{L}$ . All experiments were triplicated and data reported were mean values of three independent measurements.

## Supplementary Figures

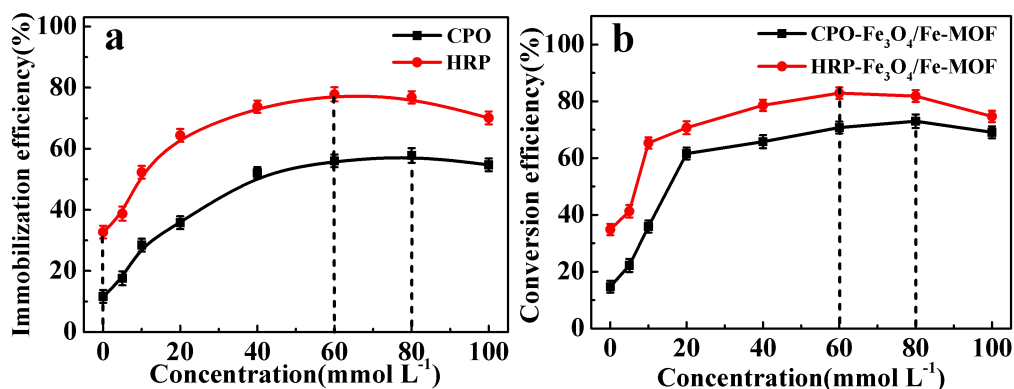

**Fig. S1** The relationship between the concentration of  $Zn^{2+}$  solution and the enzyme immobilization efficiency (a) or the catalytic efficiency (b).

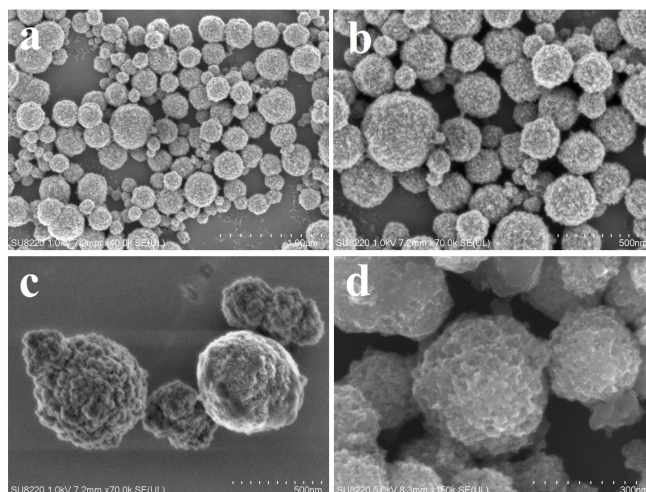

**Fig. S2** FESEM images of  $Fe_3O_4$  (a,b),  $Fe_3O_4/Fe-MOF$  (c) and CPO/HRP- $Fe_3O_4/Fe-MOF$  (d).

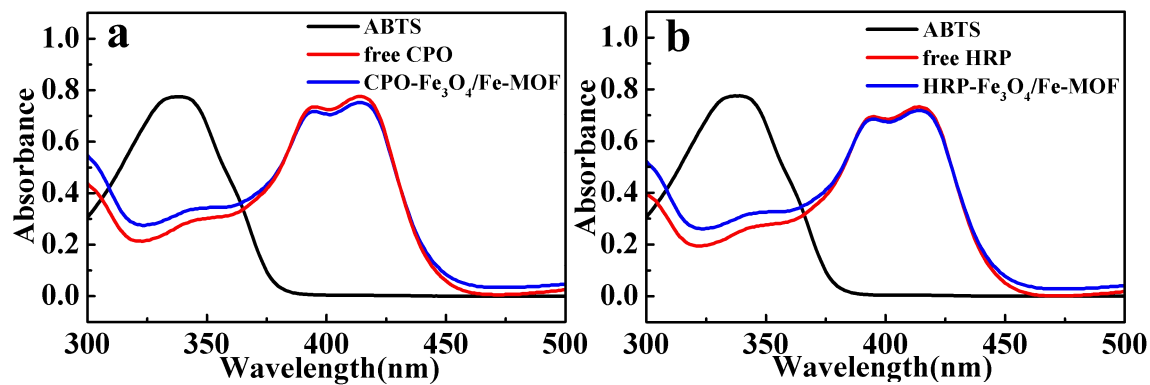

**Fig. S3** UV-Vis absorbance spectra of peroxidation of ABTS catalyzed by free enzyme and CPO/HRP- $Fe_3O_4/Fe-MOF$ : (a) CPO; (b) HRP.

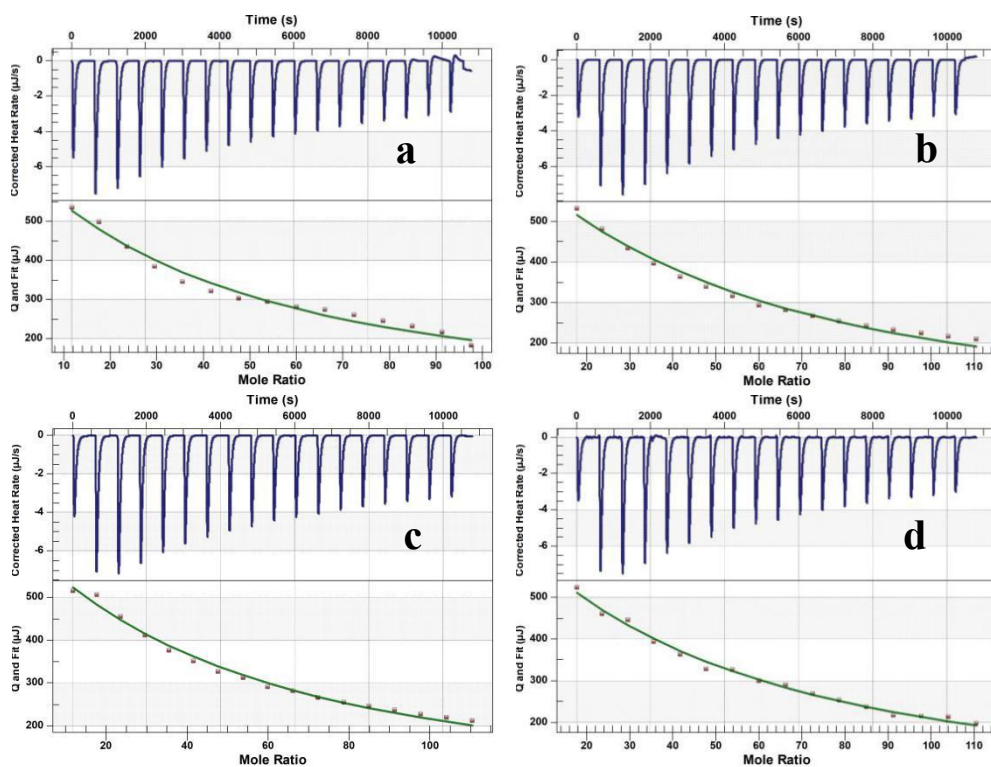

**Fig. S4** Thermogram of raw heat and enthalpy with independent model fit for the isothermal titration of 10 mM ABTS into 0.01 mM enzyme: (a) CPO; (b) CPO-Fe<sub>3</sub>O<sub>4</sub>/Fe-MOF; (c) HRP; (d) HRP-Fe<sub>3</sub>O<sub>4</sub>/Fe-MOF.

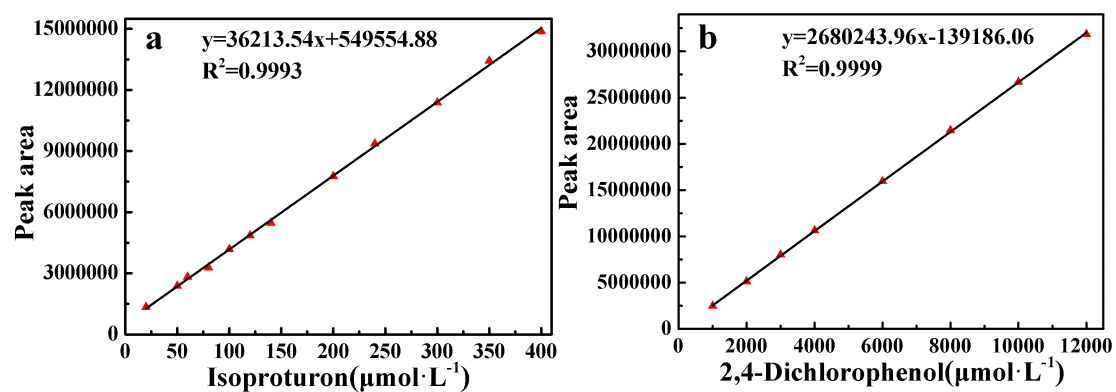

**Fig. S5** The standard curves in determination of the substrates.

## Supplementary Table

**Table S1** Thermokinetic data of the preparation process of HRP-Fe<sub>3</sub>O<sub>4</sub>/Fe-MOF at different temperatures.

| <i>T</i> /s | 298.15 K         |                       |                         | 303.15 K         |                       |                         | 308.15 K         |                       |                         |
|-------------|------------------|-----------------------|-------------------------|------------------|-----------------------|-------------------------|------------------|-----------------------|-------------------------|
|             | $(H_t/H_\infty)$ | $\ln(1-H_t/H_\infty)$ | $\ln(dH_t/dt/H_\infty)$ | $(H_t/H_\infty)$ | $\ln(1-H_t/H_\infty)$ | $\ln(dH_t/dt/H_\infty)$ | $(H_t/H_\infty)$ | $\ln(1-H_t/H_\infty)$ | $\ln(dH_t/dt/H_\infty)$ |
| 10          | 0.9507           | -0.0096               | -6.5429                 | 0.5960           | -0.0060               | -7.1168                 | 0.5670           | -0.0057               | -6.9055                 |
| 20          | 2.7465           | -0.0278               | -6.1218                 | 1.5665           | -0.0158               | -6.7559                 | 1.8976           | -0.0192               | -6.3807                 |
| 30          | 5.2126           | -0.0535               | -5.8905                 | 2.8466           | -0.0289               | -6.5540                 | 3.8354           | -0.0391               | -6.1169                 |
| 40          | 8.1647           | -0.0852               | -5.7594                 | 4.3702           | -0.0447               | -6.4158                 | 6.2077           | -0.0641               | -5.9713                 |
| 50          | 11.4546          | -0.1257               | -5.6727                 | 6.0870           | -0.0628               | -6.3155                 | 8.8710           | -0.0929               | -5.8838                 |
| 60          | 14.9829          | -0.1623               | -5.6202                 | 7.9549           | -0.0829               | -6.2482                 | 11.7288          | -0.1248               | -5.8308                 |
| 70          | 18.6669          | -0.2066               | -5.5865                 | 9.9325           | -0.1046               | -6.2028                 | 14.7130          | -0.1591               | -5.7974                 |
| 80          | 22.4517          | -0.2543               | -5.5675                 | 11.9847          | -0.1277               | -6.1733                 | 17.7786          | -0.1958               | -5.7779                 |
| 90          | 26.2884          | -0.3050               | -5.5591                 | 14.0919          | -0.1519               | -6.1503                 | 20.8884          | -0.2343               | -5.7688                 |
| 100         | 30.1460          | -0.3588               | -5.5577                 | 16.2399          | -0.1772               | -6.1352                 | 24.0171          | -0.2747               | -5.7664                 |
| 110         | 33.9959          | -0.4155               | -5.5630                 | 18.4155          | -0.2035               | -6.1262                 | 27.1448          | -0.3167               | -5.7695                 |
| 120         | 37.8213          | -0.4752               | -5.5711                 | 20.6039          | -0.2307               | -6.1237                 | 30.2571          | -0.3604               | -5.7765                 |
| 130         | 41.6060          | -0.5380               | -5.5840                 | 22.7956          | -0.2587               | -6.1226                 | 33.3420          | -0.4056               | -5.7881                 |
| 140         | 45.3398          | -0.6040               | -5.5986                 | 24.9882          | -0.2875               | -6.1225                 | 36.3859          | -0.4523               | -5.8027                 |
| 150         | 49.0139          | -0.6736               | -5.6160                 | 27.1788          | -0.3172               | -6.1259                 | 39.3836          | -0.5006               | -5.8195                 |
| 160         | 52.6234          | -0.7470               | -5.6341                 | 29.3606          | -0.3476               | -6.1289                 | 42.3266          | -0.5504               | -5.8395                 |
| 170         | 56.1659          | -0.8248               | -5.6541                 | 31.5423          | -0.3790               | -6.1246                 | 45.2098          | -0.6017               | -5.8607                 |
| 180         | 59.6357          | -0.9072               | -5.6757                 | 33.7393          | -0.4116               | -6.1164                 | 48.0294          | -0.6545               | -5.8842                 |
| 190         | 63.0309          | -0.9951               | -5.6979                 | 35.9500          | -0.4455               | -6.1131                 | 50.7824          | -0.7089               | -5.9085                 |
| 200         | 66.3499          | -1.0892               | -5.7206                 | 38.1625          | -0.4807               | -6.1149                 | 53.4676          | -0.7650               | -5.9340                 |
| 210         | 69.5936          | -1.1905               | -5.7441                 | 40.3682          | -0.5170               | -6.1198                 | 56.0863          | -0.8229               | -5.9590                 |
| 220         | 72.7619          | -1.3006               | -5.7672                 | 42.5589          | -0.5544               | -6.1284                 | 58.6369          | -0.8829               | -5.9869                 |
| 230         | 75.8581          | -1.4212               | -5.7904                 | 44.7299          | -0.5929               | -6.1379                 | 61.1168          | -0.9446               | -6.0152                 |
| 240         | 78.8817          | -1.5550               | -5.8145                 | 46.8780          | -0.6326               | -6.1497                 | 63.5270          | -1.0086               | -6.0439                 |
| 250         | 81.8362          | -1.7057               | -5.8370                 | 48.9993          | -0.6733               | -6.1631                 | 65.8681          | -1.0749               | -6.0736                 |
| 260         | 84.7222          | -1.8788               | -5.8609                 | 51.0935          | -0.7153               | -6.1762                 | 68.1399          | -1.1438               | -6.1040                 |
| 270         | 87.5432          | -2.0829               | -5.8830                 | 53.1580          | -0.7584               | -6.1907                 | 70.3428          | -1.2155               | -6.1351                 |
| 280         | 90.3009          | -2.3331               | -5.9057                 | 55.1929          | -0.8028               | -6.2056                 | 72.4774          | -1.2902               | -6.1673                 |
| 290         | 92.9987          | -2.6591               | -5.9271                 | 57.1958          | -0.8485               | -6.2221                 | 74.5437          | -1.3682               | -6.2001                 |
| 300         | 95.6385          | -3.1324               | -5.9487                 | 59.1669          | -0.8957               | -6.2385                 | 76.5443          | -1.4501               | -6.2319                 |
| 310         | 98.2227          | -4.0301               | -5.9700                 | 61.1055          | -0.9443               | -6.2544                 | 78.4817          | -1.5363               | -6.2647                 |

$H_\infty = -0.1917, -0.2797, -0.4884$  J
